# Regulation of Brown Fat Adipogenesis by Protein Tyrosine Phosphatase 1B

Kosuke Matsuo<sup>1,9</sup>, Ahmed Bettaieb<sup>1,9</sup>, Naoto Nagata<sup>1</sup>, Izumi Matsuo<sup>1</sup>, Heike Keilhack<sup>2,‡</sup>, Fawaz G. Haj<sup>1,\*</sup>

**1** Nutrition Department, University of California Davis, Davis, California, United States of America, **2** Beth Israel Deaconess Medical Center, Harvard Medical School, Boston, Massachusetts, United States of America

## Abstract

**Background:** Protein-tyrosine phosphatase 1B (PTP1B) is a physiological regulator of insulin signaling and energy balance, but its role in brown fat adipogenesis requires additional investigation.

**Methodology/Principal Findings:** To precisely determine the role of PTP1B in adipogenesis, we established preadipocyte cell lines from wild type and PTP1B knockout (KO) mice. In addition, we reconstituted KO cells with wild type, substrate-trapping (D/A) and sumoylation-resistant (K/R) PTP1B mutants, then characterized differentiation and signaling in these cells. KO, D/A- and WT-reconstituted cells fully differentiated into mature adipocytes with KO and D/A cells exhibiting a trend for enhanced differentiation. In contrast, K/R cells exhibited marked attenuation in differentiation and lipid accumulation compared with WT cells. Expression of adipogenic markers PPAR $\gamma$ , C/EBP $\alpha$ , C/EBP $\delta$ , and PGC1 $\alpha$  mirrored the differentiation pattern. In addition, the differentiation deficit in K/R cells could be reversed completely by the PPAR $\gamma$  activator troglitazone. PTP1B deficiency enhanced insulin receptor (IR) and insulin receptor substrate 1 (IRS1) tyrosyl phosphorylation, while K/R cells exhibited attenuated insulin-induced IR and IRS1 phosphorylation and glucose uptake compared with WT cells. In addition, substrate-trapping studies revealed that IRS1 is a substrate for PTP1B in brown adipocytes. Moreover, KO, D/A and K/R cells exhibited elevated AMPK and ACC phosphorylation compared with WT cells.

**Conclusions:** These data indicate that PTP1B is a modulator of brown fat adipogenesis and suggest that adipocyte differentiation requires regulated expression of PTP1B.

**Citation:** Matsuo K, Bettaieb A, Nagata N, Matsuo I, Keilhack H, et al. (2011) Regulation of Brown Fat Adipogenesis by Protein Tyrosine Phosphatase 1B. PLoS ONE 6(1): e16446. doi:10.1371/journal.pone.0016446

**Editor:** Sandra Orsulic, Cedars-Sinai Medical Center, United States of America

**Received:** October 20, 2010; **Accepted:** December 20, 2010; **Published:** January 31, 2011

**Copyright:** © 2011 Matsuo et al. This is an open-access article distributed under the terms of the Creative Commons Attribution License, which permits unrestricted use, distribution, and reproduction in any medium, provided the original author and source are credited.

**Funding:** Initial portions of this study were performed in the laboratory of Dr. Benjamin Neel (National Institutes of Health (NIH) grant R01 CA49152). This work was supported by a grant from the Center for Health and Nutrition Research (University of California Davis), a Junior Faculty Award from American Diabetes Association (7-06-JF-28), Research Grant from the Juvenile Diabetes Research Foundation (1-2009-337), and NIH grant R56 DK084317 to F.G.H. The funders had no role in study design, data collection and analysis, decision to publish, or preparation of the manuscript. They provided financial support for salary of personnel conducting the research and reagents used in these studies.

**Competing Interests:** The authors have declared that no competing interests exist.

\* E-mail: fghaj@ucdavis.edu

<sup>9</sup> These authors contributed equally to this work.

<sup>‡</sup> Current address: Merck Research Laboratories, Boston, Massachusetts, United States of America

## Introduction

The obesity epidemic has focused attention on adipose tissue and adipocyte development (adipogenesis). Adipose tissue is an important metabolic organ that integrates a wide array of homeostatic processes and is crucial for whole-body insulin sensitivity and energy metabolism [1]. White adipose tissue (WAT) is the primary site for triglyceride storage and fatty acid release in response to various energy requirements; whereas brown adipose tissue (BAT) generates heat via mitochondrial uncoupling of lipid oxidation [2]. Brown adipose is a key thermogenic tissue with a well-established role in the defense against cold in a process termed nonshivering thermogenesis [3]. In addition, BAT is recognized for its anti-obesity properties with the increase in brown adipose amount and/or function promoting a healthy phenotype. Specifically, mice with higher amounts of BAT gain less weight, are more insulin sensitive, and are protected from diabetes [4,5,6,7]. Interest in the regulation and development of

BAT gained traction in recent years with the realization that adult humans have distinct brown adipose tissue depots and that the activity of BAT varies depending on adiposity, temperature, gender and age [8,9,10,11].

Adipocyte differentiation is a complex process that requires integration of a multitude of stimuli including nutrients and hormones [12,13,14,15]. Despite differences in physiological function and developmental origins of WAT and BAT, both share similar canonical transcriptional cascades that control fat differentiation [16]. Previous detailed studies of WAT differentiation identified peroxisome proliferator-activated receptor gamma (PPAR $\gamma$ ) and CCAAT/enhancer-binding proteins (C/EBPs) as critical transcription factors regulating differentiation (reviewed in [17]). PPAR $\gamma$  is also necessary for brown fat cell development but not sufficient to drive mesenchymal cells into a brown fat cell fate. Recently, bone morphogenic protein 7 (BMP7) was identified as a regulator of brown fat cell differentiation program [18]. In addition, insulin and insulin-like growth factor 1 (IGF1) play

important roles in brown adipocyte differentiation [19]. Brown preadipocytes derived from insulin receptor (IR) and insulin receptor substrates 1–4 (IRSs) knockout (KO) mice highlight the relevance of upstream components in insulin signaling in BAT differentiation [20,21,22,23].

Tyrosyl phosphorylation is a major regulator of insulin signaling and is tightly controlled by the opposing actions of protein-tyrosine kinases (PTKs) and protein-tyrosine phosphatases (PTPs) [24,25]. Protein-tyrosine phosphatase 1B (PTP1B) is an abundant, widely expressed non-receptor tyrosine-specific phosphatase that is localized on the cytoplasmic face of the endoplasmic reticulum (ER) [26,27,28]. Whole-body PTP1B deficient mice are hyper-sensitive to insulin, lean and resistant to high fat diet-induced obesity [29,30]. The leanness is caused by increased energy expenditure that is mediated, at least in part, by neuronal PTP1B since neuron-specific PTP1B KO mice exhibit reduced body weight and increased energy expenditure [31]. In contrast, muscle- and liver-specific PTP1B deletion leads to improved insulin sensitivity without alterations in body weight [32,33]. However, the role of PTP1B in adipose tissue, specifically BAT is less clearly defined. Of note, whole-body PTP1B deficient mice exhibit increased AMP-activated protein kinase (AMPK) activity and mitochondrial content in BAT [34]. In addition, it was recently reported that PTP1B deficiency has a beneficial effect on brown adipocyte differentiation and protection against apoptosis [35].

In the current study we investigated the role of PTP1B in brown adipocyte differentiation and signaling. We utilized preadipocytes from WT and PTP1B-deficient mice and reconstituted cells to reveal that PTP1B modulates brown fat adipogenesis. In addition, we demonstrated a role for PTP1B in regulating insulin and AMPK signaling in brown adipocytes.

## Results

### Generation and characterization of PTP1B-deficient and reconstituted brown adipocytes

To investigate the role of PTP1B in brown adipocyte differentiation, we generated immortalized brown preadipocytes from wild type (Con) and whole-body PTP1B KO mice as described in Methods. To determine whether alterations in KO cells were directly caused by PTP1B deficiency, we generated isogenic cells by reconstituting KO cells with human (h) PTP1B (WT) as described in Methods. Of note, hPTP1B shares a high degree of homology to mouse (m) PTP1B, and we have previously demonstrated that hPTP1B can rescue the effects of mPTP1B deletion in mouse embryonic fibroblasts in response to growth factors stimulation [36]. In addition, KO cells were reconstituted with substrate-trapping hPTP1B D181A (D/A) mutant that retains substrate binding but is catalytically impaired [37], and sumoylation-resistant mutant hPTP1B K73, 335, 347, 389R (K/R) [38]. PTP1B is progressively sumoylated after insulin stimulation leading to inhibition of its catalytic activity and suppression of its ability to downregulate the IR [38]. Immunoblot analysis of cell lysates revealed that hPTP1B was expressed in all reconstituted cells (WT, D/A, and K/R) while mouse (m) PTP1B was expressed in Con cells and absent in KO cells (Fig. 1A). Given the cross reactivity of mouse and human PTP1B antibodies [39], we estimated that hPTP1B expression in reconstituted cells was roughly comparable to mPTP1B in wild type cells (Con). Differentiation of KO and reconstituted cells into brown adipocytes was performed as described in Methods and outlined in Fig. 1B. Cells were stained using the fat-specific dye oil red O to monitor lipid accumulation at various days of differentiation (Fig. 1B, C). Differentiation was quantitated by extracting oil red

O from stained cells and determining absorbance (from 9 independent experiments) (Fig. 1D). WT cells accumulated fat droplets and exhibited a fully differentiated phenotype with >90% of the cells containing multilocular fat droplets at day 8 (Fig. 1C). KO and D/A cells exhibited a trend for enhanced differentiation compared with WT cells, but did not reach statistical significance (Fig. 1C, D). In contrast, K/R cells treated with the same protocol failed to differentiate with only a small percentage of cells able to accumulate fat. Together, our findings indicate that differentiation of brown adipocytes requires a regulated expression of PTP1B and that its sumoylation-resistant mutant dramatically inhibits differentiation.

### Patterns of differentiation correlate with expression of adipogenic markers

To further investigate the role of PTP1B in brown adipose differentiation, we determined the expression of adipogenic markers PPAR $\gamma$ , C/EBP $\alpha$ , C/EBP $\delta$ , PPAR $\gamma$  coactivator 1 $\alpha$  (PGC1 $\alpha$ ) and preadipocyte factor 1 (Pref1) mRNAs in KO and reconstituted cells during differentiation. Consistent with previous reports [23,40], PPAR $\gamma$  exhibited a progressive increase in expression during differentiation in WT cells (Fig. 2A). Notably, KO and D/A cells revealed a comparable pattern of PPAR $\gamma$  expression, while K/R cells exhibited blunted expression throughout differentiation. Similarly, C/EBP $\alpha$  exhibited comparable expression pattern to that of PPAR $\gamma$ . Transcripts of C/EBP $\alpha$  peaked on day 4–6 in WT, KO and D/A cells, while K/R cells exhibited blunted expression (Fig. 2B). In addition, PGC1 $\alpha$  mRNA expression pattern was comparable to that of PPAR $\gamma$  increasing progressively during differentiation in WT, KO and D/A cells while K/R cells exhibited blunted expression (Fig. 2C). C/EBP $\delta$  levels were generally low in all cells and no apparent trend was observed (Fig. 2D). On the other hand, expression of Pref1, an inhibitor of adipocyte differentiation (reviewed in [41]), was elevated in K/R cells compared with KO, WT and D/A cells (Fig. 2E). Finally, protein expression of uncoupling protein 1 (UCP1), a marker of brown adipocyte differentiation, was elevated in differentiated KO and D/A cells compared with WT and was not detectable in K/R cells. This is in line with *in vivo* studies that report increased UCP1 expression (by immuno-blotting and immuno-histochemistry) in BAT of PTP1B KO mice compared with wild type mice [34]. Therefore, K/R cells exhibited attenuated differentiation, as indicated by lipid accumulation, mRNA and protein expression.

### Tyrosyl phosphorylation and differentiation of PTP1B-deficient and reconstituted adipocytes

Overall tyrosyl phosphorylation inversely correlates with adipocyte differentiation [23]; we reasoned that PTP1B deletion and/or reconstitution will likely alter tyrosyl phosphorylation and modulate differentiation. Overall tyrosyl phosphorylation was determined in lysates of KO and reconstituted adipocytes at various stages of differentiation (Fig. 3A). As differentiation progressed, we detected a trend for mild decrease in tyrosyl phosphorylation; however the overall pattern and levels were comparable in KO, WT and K/R cells (Fig. 3A). In line with this, we observed a trend of increased PTP1B expression in WT cells during differentiation, but it did not reach statistical significance (data not shown). Please note that enhanced tyrosyl phosphorylation in D/A cells likely reflects “trapped” PTP1B substrates that are protected against dephosphorylation. Previous studies indicate that Erk phosphorylation decreases during the progression of differentiation [22,23]. Indeed, Erk phosphorylation declined in

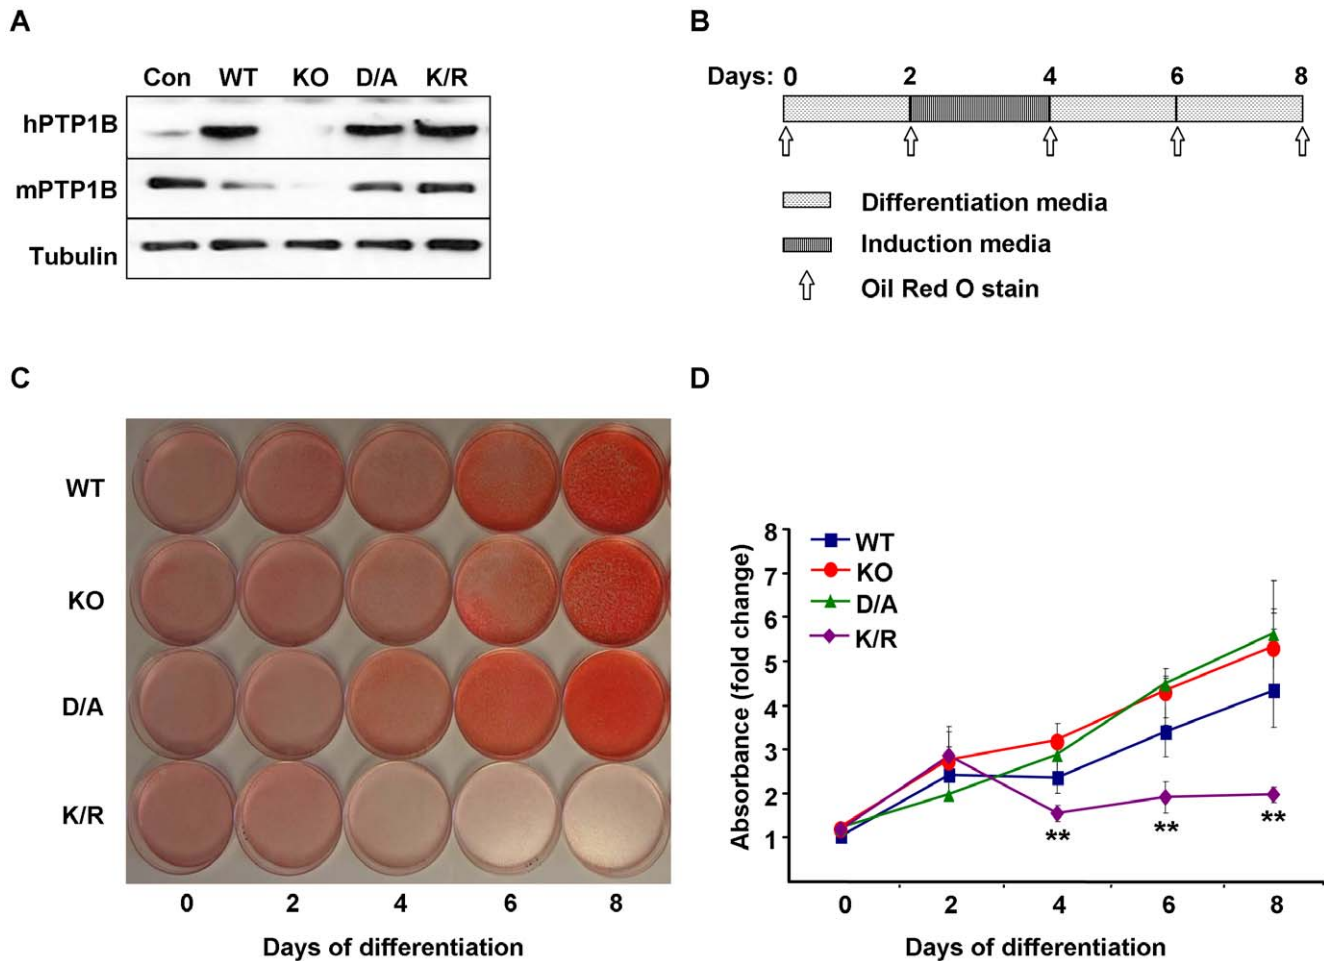

**Figure 1. PTP1B regulates brown adipocyte differentiation.** **A**) Immunoblots of human (h) and mouse (m) PTP1B expression in immortalized brown adipocytes from wild type mice (Con), PTP1B knockout (KO) mice, and KO cells reconstituted with hPTP1B (WT), substrate-trapping (D/A), and sumoylation-resistant (K/R) hPTP1B mutants. Blots were probed with anti-Tubulin antibodies as a control for loading. **B**) Schematic depicting timeline of cell differentiation and oil red O staining. **C**) Brown adipose precursor cells were grown to confluence, then differentiation was induced as described in Methods. At various stages of differentiation, cells were fixed and stained with oil red O, then the dye was extracted and its absorbance (520 nm) quantitated **(D)**. Graph represents data from nine independent experiments, and data are expressed as mean  $\pm$  SEM. (\*\*\*) indicates significant difference between K/R and WT, KO and D/A cells. doi:10.1371/journal.pone.0016446.g001

WT cells during differentiation, while KO, D/A and K/R cells failed to attenuate Erk phosphorylation (Fig. 3B). Finally, PI3K and its downstream effector, Akt play an important role in brown adipocyte differentiation [20]. Akt (Ser473) phosphorylation, adjusted to Akt expression, increased as differentiation proceeded in all cells (Fig. 3C). In addition, Akt phosphorylation was higher in KO, D/A and K/R cells compared with WT at day 0, but these differences were not sustained at later stages of differentiation (Fig. 3C). Thus, while some differences in Erk and Akt phosphorylation were observed between cells during differentiation, these are unlikely to account, on their own, for the altered differentiation pattern in these cells.

#### Regulation of insulin signaling in brown adipocytes by PTP1B

Insulin signaling is an important regulator of brown fat adipogenesis with upstream components, IR [22] and IRS1/3 [20,23,42] playing crucial roles. PTP1B attenuates insulin signaling by dephosphorylating IR [43,44] and possibly IRS1 [45,46]. Initially, we determined alterations in insulin signaling in differentiated brown

adipocytes derived from wild type (Con) and KO mice. Cells were starved overnight then stimulated with insulin for 5 minutes and tyrosyl phosphorylation of IR and IRS1 was determined in immunoprecipitates. Insulin-stimulated tyrosyl phosphorylation of IR and IRS1 was significantly enhanced in KO cells compared with controls (Fig. 4A, B). Enhanced insulin-induced IRS1 tyrosyl phosphorylation in KO cells could be primary indicating that IRS1 is a substrate of PTP1B, or secondary due to increased IR phosphorylation in KO cells. To determine if PTP1B directly interacts with IRS1 in differentiated brown adipocytes, we performed substrate-trapping experiments as previously described [37]. hPTP1B was immunoprecipitated (using FG6 antibodies) from lysates of WT and D/A cells then blotted using anti-phosphotyrosine antibodies (Fig. 4C). Notably, a hyper-phosphorylated band, whose size corresponds to IRS1 was detected in PTP1B immunoprecipitates of insulin-stimulated D/A cells. Indeed, reprobing with IRS1 antibodies identified the protein as IRS1 demonstrating that it is a direct target of PTP1B in brown adipocytes.

Next, we evaluated alterations in insulin signaling in isogenic KO and reconstituted differentiated adipocytes. Insulin-stimulated

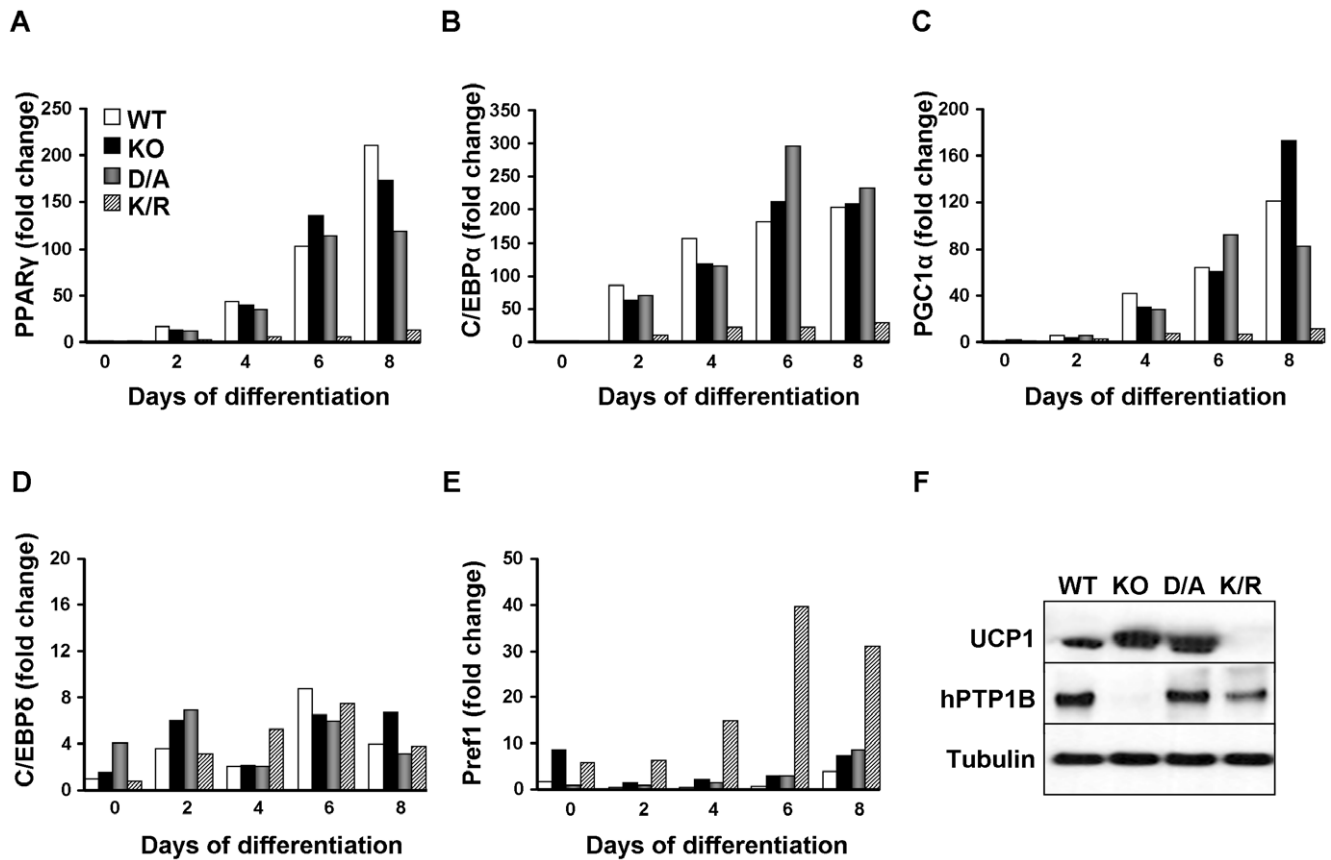

**Figure 2. Expression of differentiation markers in PTP1B KO and reconstituted adipocytes.** mRNA expression of PPAR $\gamma$  (A), C/EBP $\alpha$  (B), PGC1 $\alpha$  (C), C/EBP $\delta$  (D) and Pref1 (E) at different days of differentiation, measured by quantitative real-time PCR and normalized against GAPDH. Results are representative of two independent experiments and data are expressed as mean  $\pm$  SEM. (F) Immunoblots of UCP1 expression in differentiated cells. Blots were probed for hPTP1B and with anti-Tubulin antibodies as a control for loading. doi:10.1371/journal.pone.0016446.g002

IR tyrosyl phosphorylation, normalized to its expression, was elevated in KO and D/A cells compared with WT cells (Fig. 4D). By contrast, IR phosphorylation was significantly decreased in K/R cells consistent with the inability of insulin to suppress activity of PTP1B K/R [38]. Similarly, insulin-stimulated IRS1 tyrosyl phosphorylation, normalized to its expression, was elevated in KO and D/A cells compared with WT cells, and K/R cells exhibited comparable IRS1 phosphorylation to WT cells (Fig. 4E). Downstream insulin signaling was assessed by determining basal and insulin-stimulated Erk and Akt phosphorylation in differentiated adipocytes. Erk phosphorylation was significantly induced 5 mins after insulin stimulation compared with basal, but no major differences were observed between cells (Fig. 4F). Similarly, Akt phosphorylation was significantly induced after insulin stimulation compared with basal, but no major differences were observed between cells (Fig. 4G). Together, our findings indicate that PTP1B is a regulator of IR signaling and that IRS1 is a direct PTP1B substrate in brown adipocytes.

#### Regulation of AMPK signaling in brown adipocytes by PTP1B

AMPK is a fuel sensing enzyme complex and a regulator of brown adipose differentiation [47]. BAT from whole-body PTP1B KO mice exhibit increased  $\alpha 1$  and  $\alpha 2$  AMPK activation, as well as increased phosphorylation of  $\alpha 1$  subunit at Thr172 compared with controls [34]. In line with these observations, phosphorylation of

AMPK $\alpha$  (Thr172), adjusted to AMPK $\alpha$  expression was elevated in KO and D/A cells compared with controls (Fig. 5A). In addition, K/R cells exhibited elevated AMPK $\alpha$  phosphorylation compared with controls. AMPK activation leads to phosphorylation of its downstream target acetyl-CoA carboxylase (ACC) at Ser79 and ACC inhibition [48,49]. Consistent with AMPK $\alpha$  phosphorylation, ACC phosphorylation (Ser79) was elevated in KO, D/A and K/R cells compared with controls (Fig. 5B). LKB1 is one of the upstream kinases that activate AMPK $\alpha$  by phosphorylating Thr172 [50,51]. LKB1 protein levels were elevated in KO, D/A and K/R cells compared with controls (Fig. 5C) and likely to contribute to increased AMPK phosphorylation in these cells.

#### Insulin-stimulated glucose uptake is impaired in PTP1B K/R adipocytes

Basal and insulin-stimulated 2-deoxy-glucose uptake was determined in differentiated KO and reconstituted cells as described in Methods. There was no significant difference in basal glucose transport between cells, although KO cells exhibited a trend for increased glucose uptake compared with WT, but that did not reach statistical significance (Fig. 6A). After insulin stimulation, WT cells exhibited a significant increase in glucose uptake ( $\sim 5$  fold) in line with published observations [20,21]. A comparable increase in insulin-stimulated glucose uptake was observed in KO cells. In addition, insulin-induced glucose uptake was significantly enhanced in D/A cells and attenuated in K/R

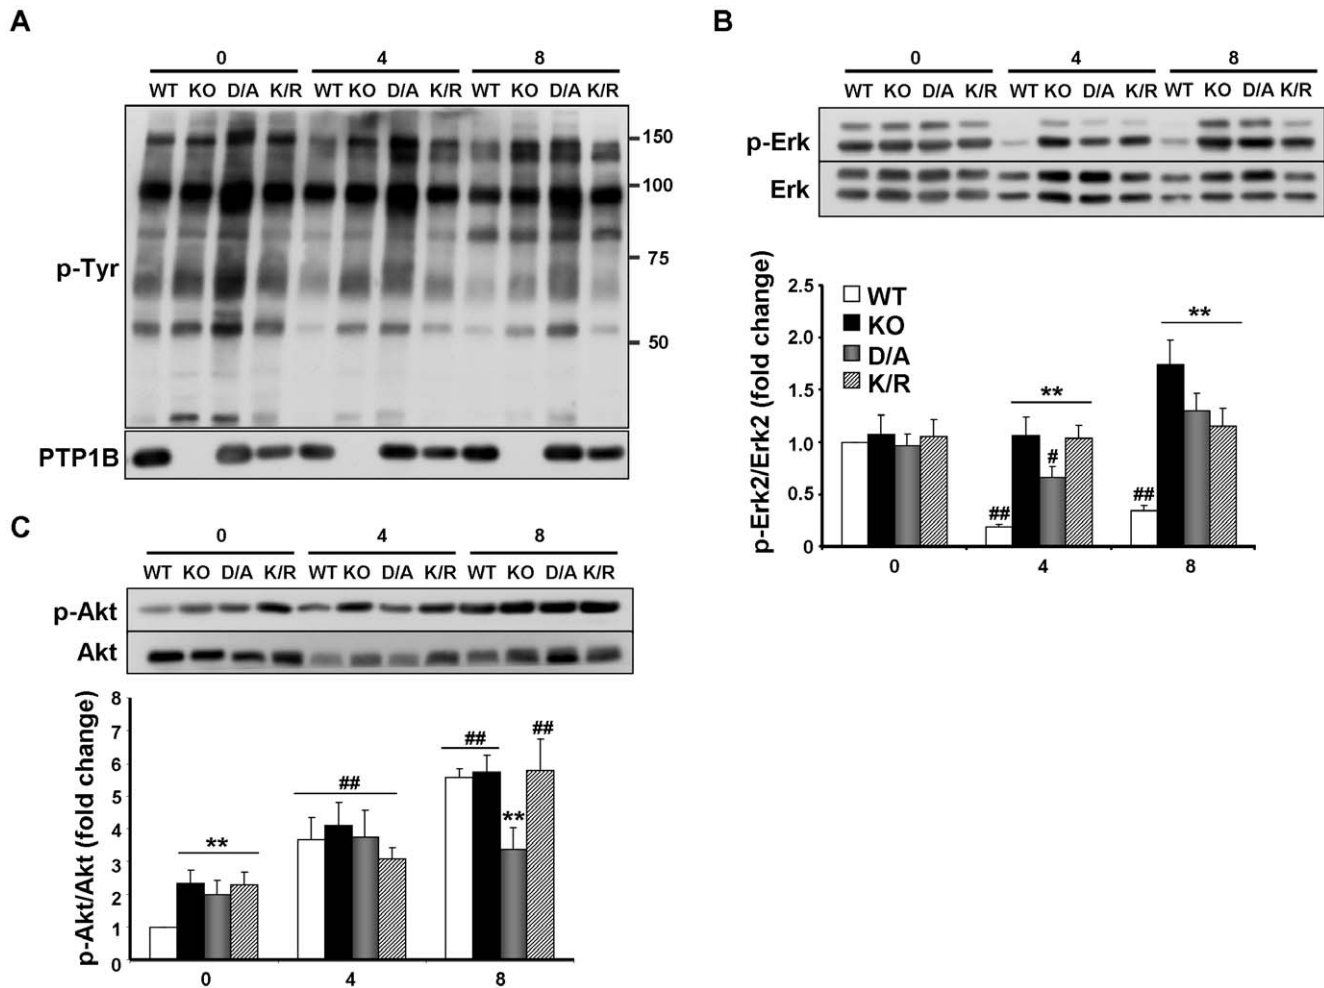

**Figure 3. Overall tyrosyl phosphorylation, Erk and Akt phosphorylation during differentiation.** **A)** Overall tyrosyl phosphorylation in WT, KO, D/A and K/R cells during differentiation. Total lysates were prepared from cells on days 0, 4 and 8 of differentiation. Blots were probed using anti-phosphotyrosine and anti-hPTP1B antibodies. Molecular weight markers are indicated on the right of the blot. Total lysates from cells at days 0, 4 and 8 of differentiation were immunoblotted for p-Erk (**B**) and p-Akt (**C**) and the corresponding proteins. (\*) indicates statistically significant difference between KO, D/A or K/R and WT under the same treatment condition, while (#) indicates statistically significant difference between WT, KO, D/A or K/R and their corresponding basal (day 0). doi:10.1371/journal.pone.0016446.g003

cells compared with WT (Fig. 6A). Decreased insulin-induced glucose uptake in K/R cells was paralleled by attenuated Glut4 expression in these cells (Fig. 6B). On the other hand, elevated glucose uptake in D/A cells was not mirrored by comparable increase in Glut4 expression in total lysates. This suggests that other factor(s), including but not limited to Glut4 translocation, could be altered in these cells. At any rate, our findings demonstrated impaired insulin-stimulated glucose uptake in K/R brown adipocytes.

#### Troglitazone treatment increases differentiation capacity of K/R cells

K/R cells failed to accumulate the adipogenic marker PPAR $\gamma$  and given its role in brown and white adipose differentiation [17], we determined the effects of PPAR $\gamma$  activation on the differentiation capacity of K/R cells. WT and K/R cells were treated with the PPAR $\gamma$  agonist troglitazone and differentiation was monitored. Addition of troglitazone to WT cells did not significantly alter their differentiation profile probably due to the natural differentiation potential of these cells (Fig. 7A, B). On the other hand, PPAR $\gamma$

activation significantly improved the ability of K/R cells to differentiate as measured by oil red O staining (Fig. 7A, B). Thus, troglitazone treatment is sufficient to override the differentiation deficit in K/R cells.

#### Discussion

Adipocyte differentiation requires integration of a multitude of stimuli and coordinated regulation of cellular responses [12,13,14,15]. Despite recent confluence of discoveries on brown fat adipogenesis, molecular regulators of this complex mechanism are not fully identified. PTP1B is an established physiological regulator of systemic insulin sensitivity and energy balance, but its role in brown fat adipogenesis warrants additional investigation. In this study we utilized immortalized brown preadipocytes from wild type and PTP1B KO mice and reconstituted KO preadipocytes to address the role of PTP1B in adipogenesis. These cells provide a useful platform since preadipocytes can differentiate into mature brown adipocytes with accumulation of multilocular fat droplets and expression of adipogenic and differentiation markers [22,42]. In addition, these cells are an established model for dissecting the

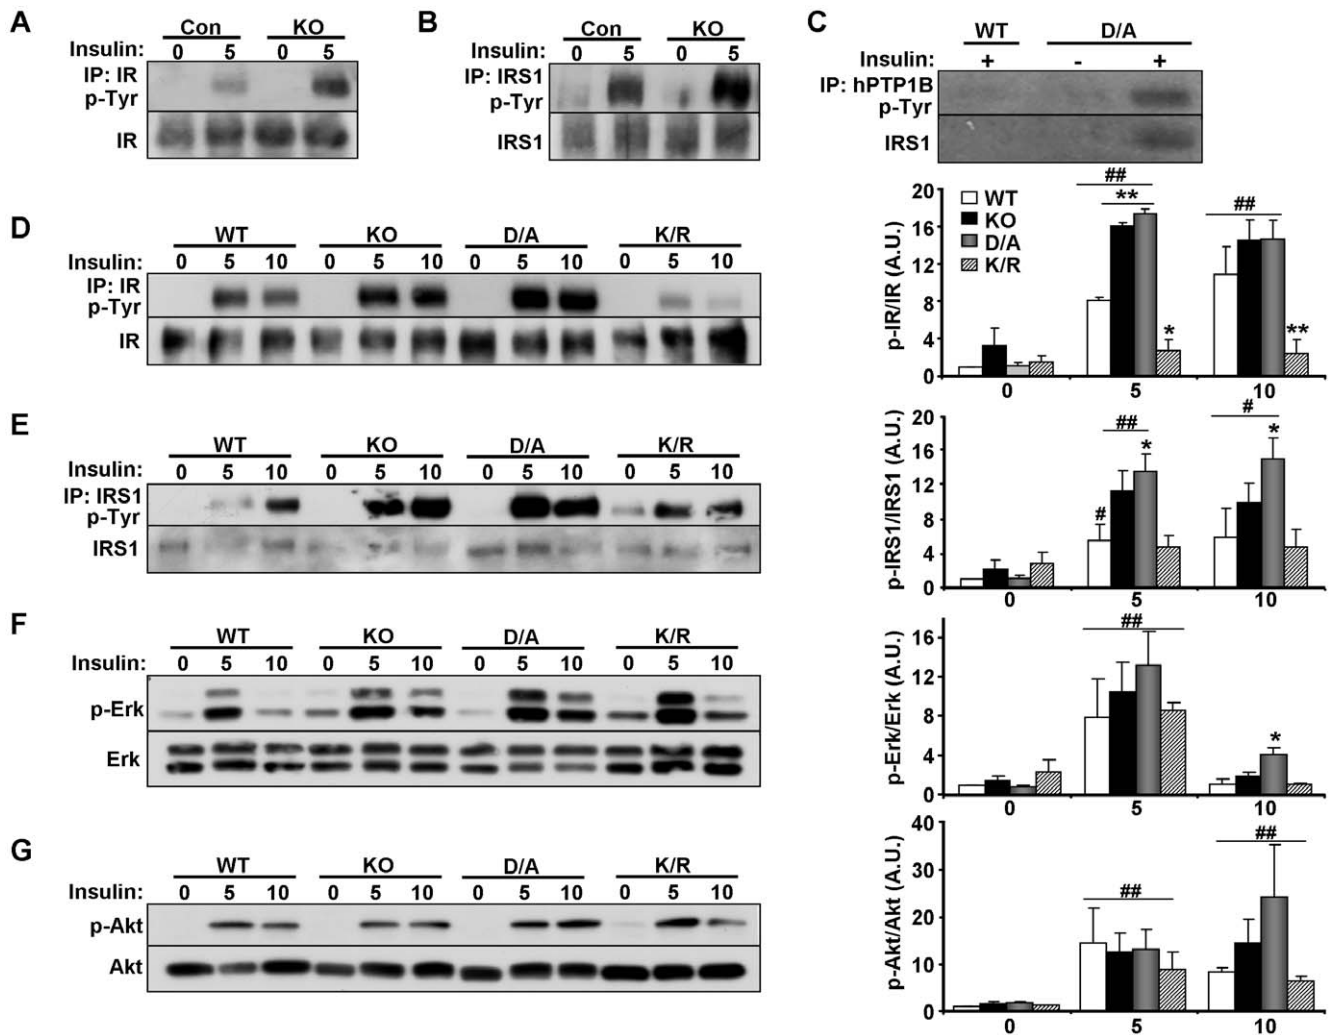

**Figure 4. Altered insulin signaling in PTP1B KO and reconstituted adipocytes.** Brown adipocyte cell lines from WT (Con) and PTP1B KO (KO) mice were differentiated then serum starved O/N and stimulated with insulin (100 nM) for 5 minutes. **A)** Lysates were immunoprecipitated using IR antibodies, immunoblotted with anti-phosphotyrosine antibodies, and then stripped and reprobed for IR to control for loading. **B)** IRS1 was immunoprecipitated from adipocyte lysates, immunoblotted with anti-phosphotyrosine antibodies, and then stripped and reprobed for IRS1 to control for loading. **C)** Lysates from cells reconstituted with WT and D/A were immunoprecipitated using hPTP1B antibodies (FG6) followed by immunoblotting with anti-phosphotyrosine and anti-IRS1 antibodies. **(D–G)** Isogenic KO and reconstituted differentiated cells were serum starved O/N then stimulated with insulin for 5 or 10 minutes. **D)** Lysates were immunoprecipitated using IR antibodies, immunoblotted with anti-phosphotyrosine antibodies, and then stripped and reprobed for IR to control for loading. **E)** IRS1 was immunoprecipitated from adipocyte lysates, immunoblotted with anti-phosphotyrosine antibodies, and then stripped and reprobed for IRS1 to control for loading. Cell lysates were immunoblotted for p-Erk **(F)** p-Akt **(G)** and the corresponding total proteins. Bar graphs are data from three independent experiments and are presented as means  $\pm$  SEM. (\*) indicates statistically significant difference between KO, D/A or K/R and WT under the same treatment condition, while (#) indicates statistically significant difference between WT, KO, D/A or K/R and their corresponding basal (no insulin). doi:10.1371/journal.pone.0016446.g004

contribution of components in insulin signaling to brown fat adipogenesis and glucose uptake [20,23,42]. Moreover, PTP1B-reconstituted cells help identify if observed alterations in KO cells are directly caused by PTP1B deletion.

Using standard differentiation protocols, KO and D/A preadipocytes exhibited a trend (that did not reach statistical significance) for increased differentiation and accumulation of fat droplets compared with WT cells. These findings are in line with those of Miranda *et al.* who report beneficial effects of PTP1B deficiency on brown fat adipogenesis [35]. Conversely, differentiation of preadipocytes expressing a sumoylation-resistant PTP1B mutant (K/R) was dramatically reduced compared with controls. The underlying reason(s) for attenuated K/R preadipocyte

differentiation is not clear. One scenario involves attenuated insulin signaling in these cells (see next paragraph). Another possibility involves alteration of signaling in distinct cellular compartment(s). The bulk of sumoylated PTP1B localizes to the perinuclear region [38], and since K/R is resistant to insulin-induced downregulation, then presumably K/R cells manifest increased and/or prolonged PTP1B activation at this region. Therefore, K/R could modulate insulin (and potentially other) signaling amplitude and/or duration to attenuate differentiation. In addition, we cannot rule out that K/R regulates a distinct set of cellular substrate(s), and this warrants additional investigation. At any rate, treatment of K/R cells with the PPAR $\gamma$  agonist troglitazone fully recovers the differentiation blockade in these

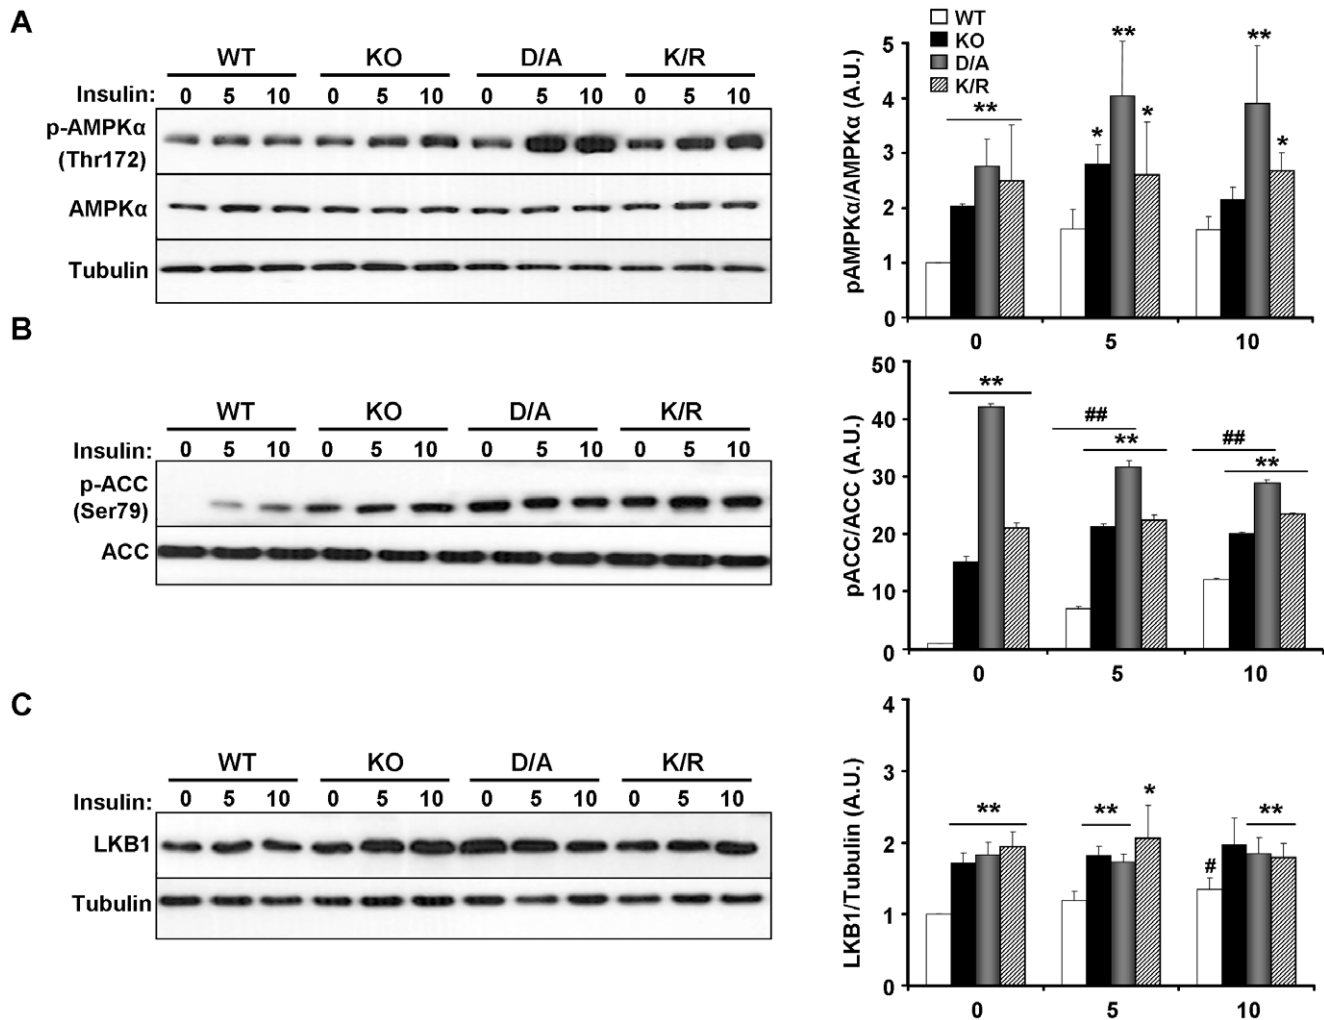

**Figure 5. Altered AMPK signaling in PTP1B KO and reconstituted adipocytes.** **A)** Immunoblotting of AMPK $\alpha$  subunit phosphorylation (Thr172) in differentiated WT, KO, D/A and K/R cells at basal and insulin-stimulated conditions. Phosphorylation of ACC (Ser79) (**B**), and LKB1 expression (**C**) in differentiated WT, KO, D/A and K/R cells at basal and insulin-stimulated conditions. Bar graphs are data from three independent experiments and are presented as means  $\pm$  SEM. (\*) indicates statistically significant difference between KO, D/A or K/R and WT under the same treatment condition, while (#) indicates statistically significant difference between WT, KO, D/A or K/R and their corresponding basal (no insulin). Editors' note: The Fig. 5A Tubulin panel was originally published as a STAT3 panel in [63], and is reused here under the terms of that article's CC-BY-4.0 DEED license. The editors recommend that the Fig. 5A results are interpreted with caution.  
doi:10.1371/journal.pone.0016446.g005

cells. This could be due to direct activation of PPAR $\gamma$ , and/or indirectly caused by the insulin-sensitizing effects of thiazolidinedione. Of note, troglitazone treatment of IR-deficient brown preadipocytes slightly improves their differentiation profile [22], and in IRS1-deficient preadipocytes reverses some of their differentiation deficits (Glut4 expression) without affecting others (fat accumulation) [20]. Although the exact mechanism of impaired differentiation of K/R cells requires additional investigation, our results demonstrate that PTP1B regulates brown fat adipogenesis.

PTP1B can regulate brown fat adipogenesis through insulin-dependent and insulin-independent signaling pathways (please see schematic in Fig. 8). Numerous studies establish insulin signaling as a critical regulator of brown fat adipogenesis [20,21,22,23,42]. Brown preadipocyte cell lines from IR KO mice exhibit dramatically impaired differentiation [22]. Similarly, preadipocytes from IRS1 KO mice exhibit a marked decrease in differentiation and lipid accumulation [20,23,42]. In addition,

expression of adipogenic makers and transcription factors (such as PPAR $\gamma$ , C/EBP $\alpha$ , PGC1 $\alpha$ , Glut4, and fatty acid synthase) is attenuated in preadipocytes from IR and IRS1 KO mice [20,22,23]. Our studies clearly established PTP1B as a regulator of IR and IRS1 signaling in differentiated brown adipocytes and demonstrated that IRS1 is a substrate of PTP1B in these cells. Insulin-induced IR and IRS1 tyrosyl phosphorylation was elevated in cells with abolished/minimal PTP1B activity (KO and D/A, respectively) and attenuated in those with increased/prolonged PTP1B activity (K/R). Similarly, PPAR $\gamma$ , C/EBP $\alpha$ , and PGC1 $\alpha$  mRNA was increased in WT, K/O and D/A cells compared with K/R. Notably, our studies demonstrated regulation of insulin-stimulated glucose uptake in adipocytes by PTP1B, but that did not fully correlate with alterations in IR and IRS1 tyrosyl phosphorylation and Glut4 expression. This in line with previous studies [52,53,54,55] that suggest that a multitude of factors are required to evoke maximal insulin-stimulated glucose transport including, but not limited to, modulation of signaling at specific



**A**

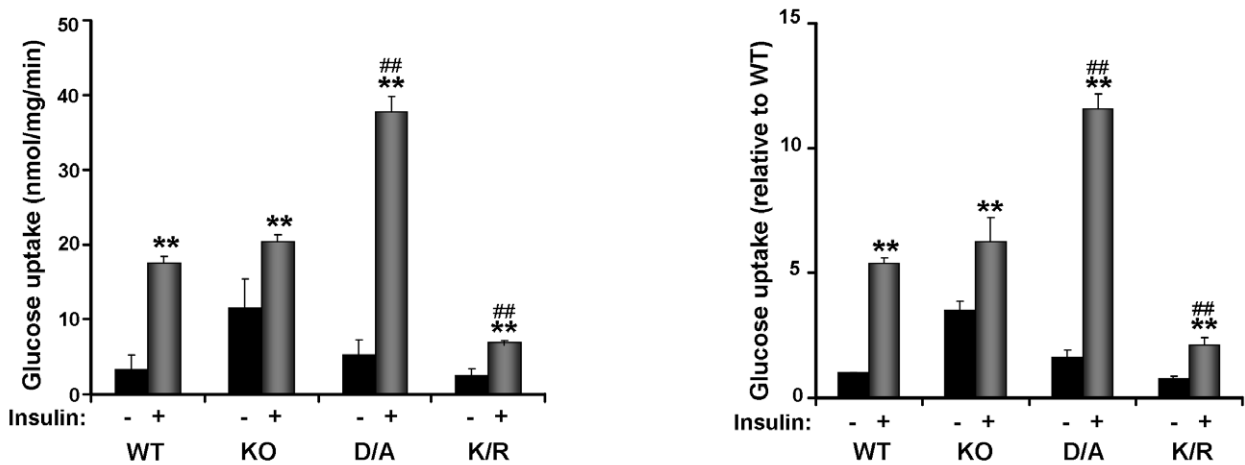

**B**

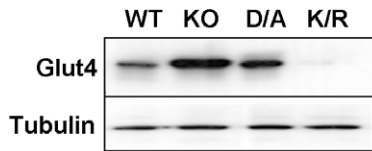

**Figure 6. Insulin-induced glucose uptake is impaired in K/R adipocytes.** **A)** Differentiated KO and reconstituted cells were serum starved O/N then stimulated with insulin (100 nM) for 30 minutes followed by addition of 2-deoxy-[<sup>3</sup>H] glucose for 3 minutes. Data are expressed as nmol of glucose taken up/mg of cell protein/min (left panel) and as percentage of basal uptake in WT cells (right panel). Bar graphs are data from three independent experiments and data are presented as means ± SEM. **B)** Immunoblots of Glut4 expression in differentiated cells. Blots were probed with anti-Tubulin antibodies as a control for loading. (\*) indicates statistically significant difference between basal and insulin-stimulated conditions in each cell type, while (#) indicates statistically significant difference between insulin-stimulated glucose uptake in KO, D/A and K/R cells compared with WT.

doi:10.1371/journal.pone.0016446.g006

intracellular compartments. Collectively, our findings indicate that alteration of insulin signaling via modulation of PTP1B activity accounts, at least in part, for the observed differentiation effects.

PTP1B also can regulate brown fat adipogenesis through insulin-independent signaling pathways (Fig. 8). AMPK has been implicated in the regulation of brown fat adipogenesis. Inhibition

**A**

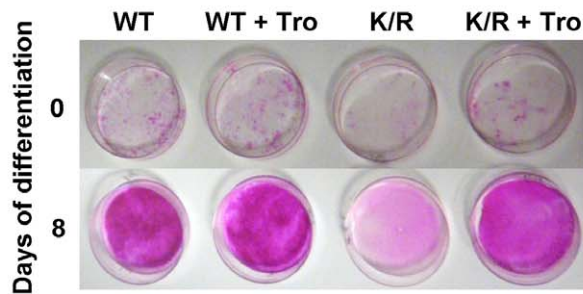

**B**

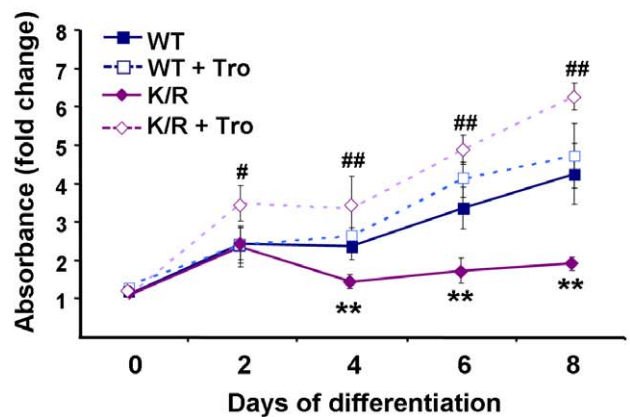

**Figure 7. Differentiation capacity of K/R cells is improved by troglitazone treatment.** WT and K/R cells were induced to differentiate in the absence or presence of 25 μM troglitazone. **A)** At differentiation days 0 and 8 cells were stained with oil red O and differentiation quantitated **(B)**. Graph represents data from three independent experiments, and data are expressed as mean ± SEM. (\*) indicates statistically significant difference between untreated K/R and WT cells, and (#) indicates statistically significant difference between untreated K/R and troglitazone-treated K/R cells.



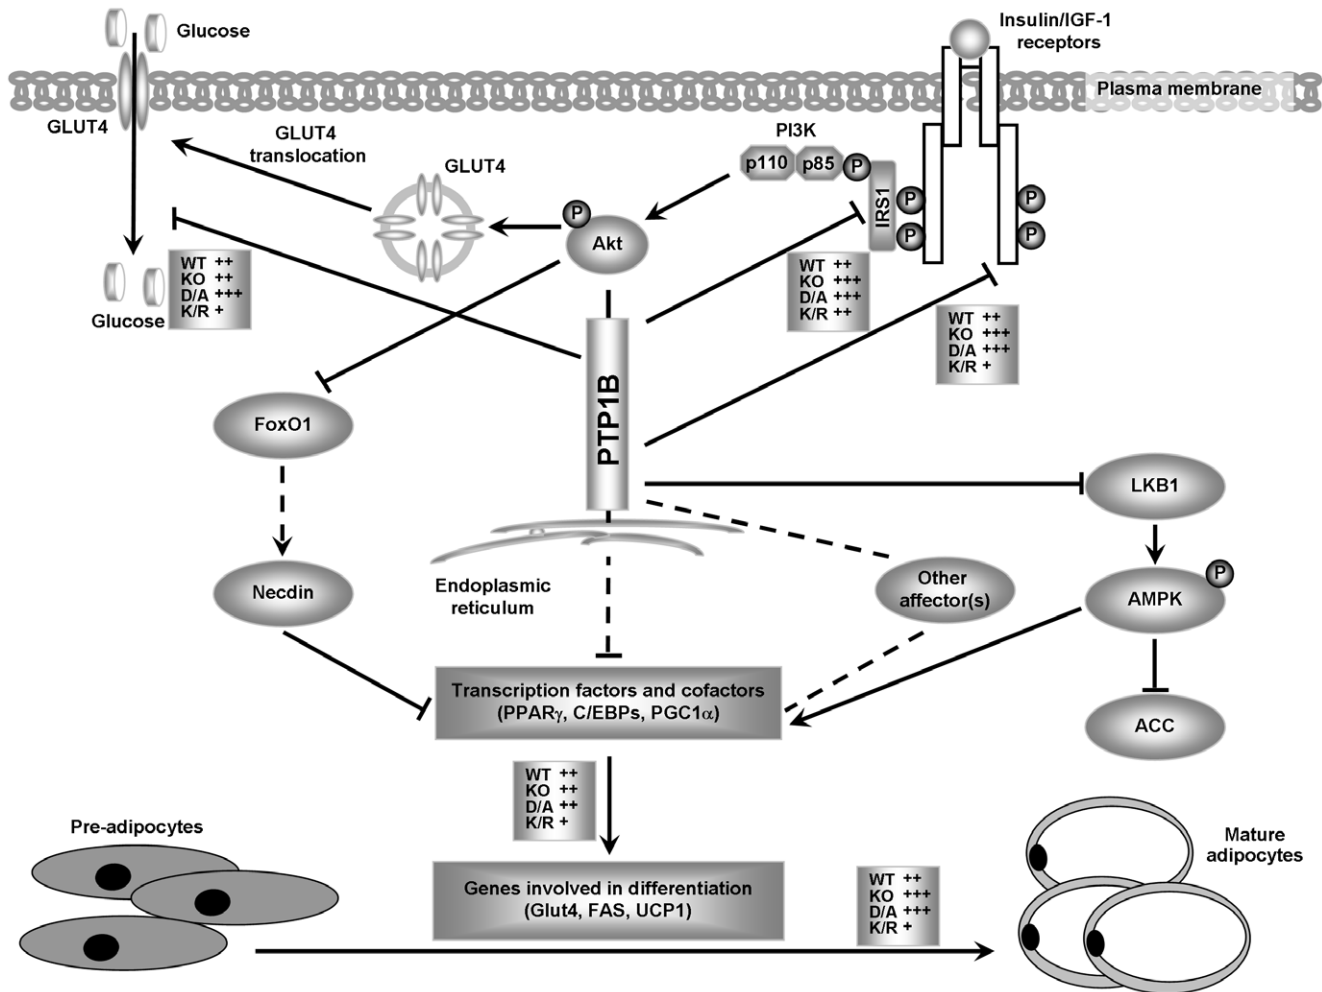

**Figure 8. Proposed model of regulation of brown fat adipogenesis by PTP1B.** PTP1B can regulate adipogenesis through insulin-dependent and insulin-independent pathways. Activation of cell surface receptors of insulin or IGF1 leads to phosphorylation of IRS proteins, activation of PI3K and MAPK pathway, and glucose uptake. Alterations in downstream signaling (summarized in Tseng *et al.* [23,40]) lead to the initiation of transcriptional cascades that involve PPAR $\gamma$ , C/EBPs, and PGC1 $\alpha$  and cause changes that are required for differentiation of brown adipocytes (expression of Glut4 and UCP1). PTP1B dephosphorylates IR and IRS1 in differentiated brown adipocytes and modulates insulin-stimulated glucose uptake. In addition, PTP1B regulates LKB1/AMPK signaling pathway in differentiated brown adipocytes. Conceivably, PTP1B also could modulate other affector(s) of cellular signaling to regulate transcription factors and cofactor to influence differentiation. Effects of KO, D/A and K/R on adipose differentiation, IR and IRS1 tyrosyl phosphorylation, glucose uptake, and LKB1/AMPK signaling are summarized. Alterations in KO, D/A and K/R are indicated with the symbol (+) and compared with WT (set at ++). Arrows indicate activation and T-shaped lines indicate repression. A dashed line indicates that the connection has not been completely established.  
doi:10.1371/journal.pone.0016446.g008

of AMPK blocks brown but not white adipocyte differentiation, and chronic activation of AMPK *in vivo* increases brown adipocytes within WAT depots [47]. Notably, AMPK activity is elevated, and AMPK target genes that regulate mitochondrial biogenesis are induced in BAT of PTP1B KO mice [34]. In line with this, our data demonstrated regulation of AMPK signaling by PTP1B in brown adipocytes. Collectively, these findings indicate that PTP1B can regulate brown adipose differentiation, at least in part, through AMPK signaling. Finally, we cannot rule out modulation of additional affectors(s) of brown adipose differentiation by PTP1B (Fig. 8). Adipogenic differentiation is associated with downregulation of Wnt/ $\beta$ -catenin signaling [56,57,58]. Since PTP1B has been implicated in regulating  $\beta$ -catenin signaling [59,60] it is tempting to speculate that it could influence adipogenesis through this signaling pathway. Proper execution of adipogenesis requires integration of a wide array of stimuli and

regulated expression of numerous genes, so it is not surprising that PTP1B participates in this complex process through regulating various signaling pathways.

In summary, our studies identify PTP1B as a modulator of brown fat adipogenesis, and suggest that adipocyte differentiation requires regulated expression of PTP1B. These findings are of direct relevance to obesity and diabetes given the contribution of brown fat to energy homeostasis, and considering that PTP1B is a target that is being harnessed as a potential therapeutic.

## Materials and Methods

### Chemicals and reagents

Dulbecco's Modified Eagle Medium (DMEM), fetal bovine serum (FBS) and trypsin were purchased from Invitrogen (Carlsbad, CA). Antibodies for human PTP1B (FG6), mouse

PTP1B, IR, IRS1 were purchased from Upstate Biotechnology (Lake Placid, NY), pAkt (Ser473), pErk, pAMPK (Thr172), AMPK, pACC (Ser79), ACC were purchased from Cell Signaling Technology (Beverly, MA), LKB1, Tubulin, Akt and Erk were from Santa Cruz Biotechnology (Santa Cruz, CA). Horseradish peroxidase (HRP)-conjugated secondary antibodies were purchased from BioResources International (Carlsbad, CA). Unless otherwise indicated, chemicals were purchased from Sigma (St. Louis, MO).

### Cell isolation and culture

Brown adipocytes and their precursor cells were isolated from newborn wild type and whole-body PTP1B KO mice by collagenase digestion as described previously [61]. Preadipocytes were immortalized by infection with the retroviral vector pBAGE encoding SV40T-antigen then selected with puromycin (2  $\mu$ g/ml). To induce cell differentiation, preadipocytes were grown to confluence in culture medium containing 20% FBS. Confluent cells were then switched to differentiation media containing 20% FBS, 20 nM insulin and 1 nM triiodothyronine [T3] for 48 hours. Adipocyte differentiation was induced by treating cells for 48 h in differentiation medium further supplemented with 0.5  $\mu$ M dexamethasone, 0.5 mM isobutylmethylxanthine, and 0.125 mM indomethacin (induction media). After induction, cells were returned to differentiation medium, and at day 8 exhibited a fully differentiated phenotype with massive accumulation of multilocular fat droplets. All animal work was conducted following federal guidelines and in accordance with University of California Davis IACUC approval (protocol # 13064).

For oil red O staining, cells were fixed with 10% buffered formalin for at least 1 hour at room temperature. Cells were then stained for one hour with filtered oil red O solution (5g/liter in isopropyl alcohol), washed with distilled water, and visualized. Oil red O was quantified spectrophotometrically at 520 nm.

PTP1B KO cell lines were reconstituted using retrovirus encoding human PTP1B wild type (WT), substrate-trapping mutant PTP1B D/A [37], and sumoylation-resistant mutant PTP1B K/R [38] as we previously described [36]. Briefly, viral  $\Phi$  NX-packaging cells were transfected with retroviral vectors using Lipofectamine 2000 (Invitrogen) following manufacturer's instructions and viral supernatants were harvested 48 h after transfection. PTP1B KO cells were infected with polybrene (4  $\mu$ g/ml)-supplemented virus-containing supernatants. Selection was started 48 hours after infection with 200  $\mu$ g/ml of hygromycin (Invitrogen) and pools of drug-resistant cells maintained.

### Biochemical analyses

For signaling experiments, cells were starved overnight then stimulated with insulin (100 nM) for 5 or 10 minutes. Cells were lysed using radio-immunoprecipitation assay (RIPA) buffer (10 mM Tris-HCl, pH 7.4, 150 mM NaCl, 0.1% sodium dodecyl sulfate [SDS], 1% Triton X-100, 1% sodium deoxycholate, 5 mM EDTA, 1 mM NaF, 1 mM sodium orthovanadate and protease inhibitors). Extracts were sonicated and clarified by centrifugation at 13,000 rpm for 10 min, and protein concentrations were determined using a bicinchoninic acid protein assay kit (Pierce Chemical, Rockford, IL). Proteins (500–1000  $\mu$ g) were subjected to immunoprecipitation using IR, IRS1 and phosphotyrosine (4G10) antibodies. For substrate-trapping experiments, lysates were prepared in 1% NP40 buffer with a protease inhibitor cocktail (without sodium orthovanadate) and hPTP1B was

immunoprecipitated using FG6 antibodies. Immune complexes were collected on protein G-Sepharose beads (GE Healthcare) and washed with lysis buffer. Proteins were resolved by SDS-PAGE and transferred to PVDF membranes. Immunoblotting of total cell lysates and immunoprecipitates was performed with antibodies for phosphotyrosine (1/10,000), IR (1/1,000), IRS1 (1/500), pErk (Thr202/Tyr204) (1/20,000), pAkt (Ser473) (1/10,000), Erk (1/10,000), Akt (1/5,000), UCP1 (1/5,000), pAMPK $\alpha$  (1/2,000), AMPK $\alpha$  (1/2,000), pACC (1/1,000), LKB1 (1/2,000) and Tubulin (1/1,000). After incubation with appropriate secondary antibodies, proteins were visualized using enhanced chemiluminescence (Amersham Biosciences). Pixel intensities of immunoreactive bands were quantified using FluorChem 9900 (Alpha Innotech).

RNA was extracted from differentiated adipocytes using TRIzol reagent (Invitrogen). cDNA was generated using high-capacity cDNA Archive Kit (Applied Biosystems). Expression of PPAR $\gamma$ , C/EBP $\alpha$ , C/EBP $\delta$ , PGC1 $\alpha$  and Pref1 was assessed by quantitative real-time PCR (iCycler, BioRad) with appropriate primers (Table S1) and normalized to glyceraldehyde 3-phosphate dehydrogenase (GAPDH).

### Glucose uptake assay

Cells were assayed for glucose uptake essentially as described [62]. Briefly, differentiated brown adipocytes were treated with insulin for 30 minutes after which 2-deoxy- $^3$ H glucose (0.5  $\mu$ Ci/ml, final concentration) was added for an additional 3 minutes. The incorporated radioactivity was quantitated using liquid scintillation counting.

### Statistical analyses

Data are expressed as means  $\pm$  standard error of the mean (SEM). Statistical analyses were performed using JMP program (SAS Institute). Comparisons between groups were made by unpaired two-tailed Student's *t* test. Differences were considered significant at  $P \leq 0.05$  and highly significant at  $P \leq 0.01$ . A single symbol (such as \*) indicates  $P \leq 0.05$  and a double symbol (\*\*\*) indicates  $P \leq 0.01$ .

### Supporting Information

**Table S1 Primers used for real time PCR.** Primer sequences used to determine mRNA expression levels of PPAR $\gamma$ , C/EBP $\alpha$ , C/EBP $\delta$ , Pref1, PGC1 $\alpha$  and GAPDH in brown adipocytes during differentiation. (DOC)

### Acknowledgments

We thank Drs. Kohjiro Ueki (University of Tokyo) for help and advice on brown adipocyte culture, Jonathan Chernoff (Fox Chase Cancer Center) for PTP1B K/R construct, Sean Adams (UCD) for UCP1 antibodies, and Yu-Hua Tseng (Joslin Diabetes Center/Harvard Medical School) for RT-PCR primer sequences. Initial portions of this study were performed in the laboratory of Dr. Benjamin Neel (BIDMC/Harvard Medical School) and we thank him for his help and support. We thank members of the laboratory for critical comments on the manuscript.

### Author Contributions

Conceived and designed the experiments: FGH. Performed the experiments: KM AB NN IM HK FGH. Analyzed the data: KM AB NN FGH. Contributed reagents/materials/analysis tools: KM HK FGH. Wrote the paper: AB NN FGH.

## References

- Rosen ED, Spiegelman BM (2006) Adipocytes as regulators of energy balance and glucose homeostasis. *Nature* 444: 847–853.
- Farmer SR (2008) Molecular determinants of brown adipocyte formation and function. *Genes Dev* 22: 1269–1275.
- Cannon B, Nedergaard J (2004) Brown adipose tissue: function and physiological significance. *Physiol Rev* 84: 277–359.
- Kopecky J, Clarke G, Enerback S, Spiegelman B, Kozak LP (1995) Expression of the mitochondrial uncoupling protein gene from the aP2 gene promoter prevents genetic obesity. *J Clin Invest* 96: 2914–2923.
- Cederberg A, Gronning LM, Ahren B, Tasken K, Carlsson P, et al. (2001) FOXC2 is a winged helix gene that counteracts obesity, hypertriglyceridemia, and diet-induced insulin resistance. *Cell* 106: 563–573.
- Tsukiyama-Kohara K, Poulin F, Kohara M, DeMaria CT, Cheng A, et al. (2001) Adipose tissue reduction in mice lacking the translational inhibitor 4E-BP1. *Nat Med* 7: 1128–1132.
- Xue B, Rim JS, Hogan JC, Coulter AA, Koza RA, et al. (2007) Genetic variability affects the development of brown adipocytes in white fat but not in interscapular brown fat. *J Lipid Res* 48: 41–51.
- Saito M, Okamatsu-Ogura Y, Matsushita M, Watanabe K, Yoneshiro T, et al. (2009) High incidence of metabolically active brown adipose tissue in healthy adult humans: effects of cold exposure and adiposity. *Diabetes* 58: 1526–1531.
- Cypess AM, Lehman S, Williams G, Tal I, Rodman D, et al. (2009) Identification and importance of brown adipose tissue in adult humans. *N Engl J Med* 360: 1509–1517.
- Virtanen KA, Lidell ME, Orava J, Heglind M, Westergren R, et al. (2009) Functional brown adipose tissue in healthy adults. *N Engl J Med* 360: 1518–1525.
- van Marken Lichtenbelt WD, Vanhomerig JW, Smulders NM, Drossaerts JM, Kemerink GJ, et al. (2009) Cold-activated brown adipose tissue in healthy men. *N Engl J Med* 360: 1500–1508.
- Rosen ED, Walkey CJ, Puigserver P, Spiegelman BM (2000) Transcriptional regulation of adipogenesis. *Genes Dev* 14: 1293–1307.
- Rangwala SM, Lazar MA (2000) Transcriptional control of adipogenesis. *Annu Rev Nutr* 20: 535–559.
- Koutnikova H, Auwerx J (2001) Regulation of adipocyte differentiation. *Ann Med* 33: 556–561.
- Camp HS, Ren D, Leff T (2002) Adipogenesis and fat-cell function in obesity and diabetes. *Trends Mol Med* 8: 442–447.
- Kajimura S, Seale P, Spiegelman BM (2010) Transcriptional control of brown fat development. *Cell Metab* 11: 257–262.
- Farmer SR (2006) Transcriptional control of adipocyte formation. *Cell Metab* 4: 263–273.
- Tseng YH, Kokkotou E, Schulz TJ, Huang TL, Winnay JN, et al. (2008) New role of bone morphogenetic protein 7 in brown adipogenesis and energy expenditure. *Nature* 454: 1000–1004.
- Gregoire FM, Smas CM, Sul HS (1998) Understanding adipocyte differentiation. *Physiol Rev* 78: 783–809.
- Fasshauer M, Klein J, Kriauciunas KM, Ueki K, Benito M, et al. (2001) Essential role of insulin receptor substrate 1 in differentiation of brown adipocytes. *Mol Cell Biol* 21: 319–329.
- Fasshauer M, Klein J, Ueki K, Kriauciunas KM, Benito M, et al. (2000) Essential role of insulin receptor substrate-2 in insulin stimulation of Glut4 translocation and glucose uptake in brown adipocytes. *J Biol Chem* 275: 25494–25501.
- Entingh AJ, Taniguchi CM, Kahn CR (2003) Bi-directional regulation of brown fat adipogenesis by the insulin receptor. *J Biol Chem* 278: 33377–33383.
- Tseng YH, Kriauciunas KM, Kokkotou E, Kahn CR (2004) Differential roles of insulin receptor substrates in brown adipocyte differentiation. *Mol Cell Biol* 24: 1918–1929.
- Sun H, Tonks NK (1994) The coordinated action of protein tyrosine phosphatases and kinases in cell signaling. *Trends Biochem Sci* 19: 480–485.
- Tonks NK (2006) Protein tyrosine phosphatases: from genes, to function, to disease. *Nat Rev Mol Cell Biol* 7: 833–846.
- Frangioni JV, Beahm PH, Shifrin V, Jost CA, Neel BG (1992) The nontransmembrane tyrosine phosphatase PTP-1B localizes to the endoplasmic reticulum via its 35 amino acid C-terminal sequence. *Cell* 68: 545–560.
- Woodford-Thomas TA, Rhodes JD, Dixon JE (1992) Expression of a protein tyrosine phosphatase in normal and v-src-transformed mouse 3T3 fibroblasts. *J Cell Biol* 117: 401–414.
- Haj FG, Verveer PJ, Squire A, Neel BG, Bastiaens PI (2002) Imaging sites of receptor dephosphorylation by PTP1B on the surface of the endoplasmic reticulum. *Science* 295: 1708–1711.
- Elchebly M, Payette P, Michaliszyn E, Cromlish W, Collins S, et al. (1999) Increased insulin sensitivity and obesity resistance in mice lacking the protein tyrosine phosphatase-1B gene. *Science* 283: 1544–1548.
- Klaman LD, Boss O, Peroni OD, Kim JK, Martino JL, et al. (2000) Increased energy expenditure, decreased adiposity, and tissue-specific insulin sensitivity in protein-tyrosine phosphatase 1B-deficient mice. *Mol Cell Biol* 20: 5479–5489.
- Bence KK, Delibegovic M, Xue B, Gorgun CZ, Hotamisligil GS, et al. (2006) Neuronal PTP1B regulates body weight, adiposity and leptin action. *Nat Med* 12: 917–924.
- Delibegovic M, Bence KK, Mody N, Hong EG, Ko HJ, et al. (2007) Improved glucose homeostasis in mice with muscle-specific deletion of protein-tyrosine phosphatase 1B. *Mol Cell Biol* 27: 7727–7734.
- Delibegovic M, Zimmer D, Kauffman C, Rak K, Hong EG, et al. (2008) Liver-Specific Deletion of Protein-Tyrosine Phosphatase 1B (PTP1B) Improves Metabolic Syndrome and Attenuates Diet-Induced ER Stress. *Diabetes*.
- Xue B, Pulinkunnil T, Murano I, Bence KK, He H, et al. (2009) Neuronal protein tyrosine phosphatase 1B deficiency results in inhibition of hypothalamic AMPK and isoform-specific activation of AMPK in peripheral tissues. *Mol Cell Biol* 29: 4563–4573.
- Miranda S, Gonzalez-Rodriguez A, Revuelta-Cervantes J, Rondinone CM, Valverde AM (2010) Beneficial effects of PTP1B deficiency on brown adipocyte differentiation and protection against apoptosis induced by pro- and anti-inflammatory stimuli. *Cell Signal* 22: 645–659.
- Haj FG, Markova B, Klaman LD, Bohmer FD, Neel BG (2003) Regulation of receptor tyrosine kinase signaling by protein tyrosine phosphatase-1B. *J Biol Chem* 278: 739–744.
- Flint AJ, Tiganis T, Barford D, Tonks NK (1997) Development of “substrate-trapping” mutants to identify physiological substrates of protein tyrosine phosphatases. *Proc Natl Acad Sci U S A* 94: 1680–1685.
- Dadke S, Cotteret S, Yip SC, Jaffer ZM, Haj F, et al. (2007) Regulation of protein tyrosine phosphatase 1B by sumoylation. *Nat Cell Biol* 9: 80–85.
- Zabolotny JM, Haj FG, Kim YB, Kim HJ, Shulman GI, et al. (2004) Transgenic overexpression of protein-tyrosine phosphatase 1B in muscle causes insulin resistance, but overexpression with leukocyte antigen-related phosphatase does not additively impair insulin action. *J Biol Chem* 279: 24844–24851.
- Tseng YH, Butte AJ, Kokkotou E, Yechoor VK, Taniguchi CM, et al. (2005) Prediction of preadipocyte differentiation by gene expression reveals role of insulin receptor substrates and necln. *Nat Cell Biol* 7: 601–611.
- Sul HS (2009) Minireview: Pref-1: role in adipogenesis and mesenchymal cell fate. *Mol Endocrinol* 23: 1717–1725.
- Valverde AM, Kahn CR, Benito M (1999) Insulin signaling in insulin receptor substrate (IRS)-1-deficient brown adipocytes: requirement of IRS-1 for lipid synthesis. *Diabetes* 48: 2122–2131.
- Goldstein BJ (2001) Protein-tyrosine phosphatase 1B (PTP1B): a novel therapeutic target for type 2 diabetes mellitus, obesity and related states of insulin resistance. *Curr Drug Targets Immune Endocr Metabol Disord* 1: 265–275.
- Tonks NK (2003) PTP1B: from the sidelines to the front lines! *FEBS Lett* 546: 140–148.
- Calera MR, Vallega G, Pilch PF (2000) Dynamics of protein-tyrosine phosphatases in rat adipocytes. *J Biol Chem* 275: 6308–6312.
- Goldstein BJ, Bittner-Kowalczyk A, White MF, Harbeck M (2000) Tyrosine dephosphorylation and deactivation of insulin receptor substrate-1 by protein-tyrosine phosphatase 1B. Possible facilitation by the formation of a ternary complex with the Grb2 adaptor protein. *J Biol Chem* 275: 4283–4289.
- Vila-Bedmar R, Lorenzo M, Fernandez-Veledo S (2010) Adenosine 5'-monophosphate-activated protein kinase-mammalian target of rapamycin cross talk regulates brown adipocyte differentiation. *Endocrinology* 151: 980–992.
- Hardie DG, Carling D, Carlson M (1998) The AMP-activated/SNF1 protein kinase subfamily: metabolic sensors of the eukaryotic cell? *Annu Rev Biochem* 67: 821–855.
- Winder WW, Hardie DG (1999) AMP-activated protein kinase, a metabolic master switch: possible roles in type 2 diabetes. *Am J Physiol* 277: E1–10.
- Hawley SA, Boudeau J, Reid JL, Mustard KJ, Udd L, et al. (2003) Complexes between the LKB1 tumor suppressor, STRAD alpha/beta and MO25 alpha/beta are upstream kinases in the AMP-activated protein kinase cascade. *J Biol* 2: 28.
- Shaw RJ, Kosmatka M, Bardeesy N, Hurley RL, Witters LA, et al. (2004) The tumor suppressor LKB1 kinase directly activates AMP-activated kinase and regulates apoptosis in response to energy stress. *Proc Natl Acad Sci U S A* 101: 3329–3335.
- Venable CL, Frevert EU, Kim YB, Fischer BM, Kamatkar S, et al. (2000) Overexpression of protein-tyrosine phosphatase-1B in adipocytes inhibits insulin-stimulated phosphoinositide 3-kinase activity without altering glucose transport or Akt/Protein kinase B activation. *J Biol Chem* 275: 18318–18326.
- Frevert EU, Bjorbaek C, Venable CL, Keller SR, Kahn BB (1998) Targeting of constitutively active phosphoinositide 3-kinase to GLUT4-containing vesicles in 3T3-L1 adipocytes. *J Biol Chem* 273: 25480–25487.
- Nave BT, Haigh RJ, Hayward AC, Siddle K, Shepherd PR (1996) Compartment-specific regulation of phosphoinositide 3-kinase by platelet-derived growth factor and insulin in 3T3-L1 adipocytes. *Biochem J* 318(Pt 1): 55–60.
- Clark SF, Martin S, Carozzi AJ, Hill MM, James DE (1998) Intracellular localization of phosphatidylinositol 3-kinase and insulin receptor substrate-1 in adipocytes: potential involvement of a membrane skeleton. *J Cell Biol* 140: 1211–1225.
- Ross SE, Hemati N, Longo KA, Bennett CN, Lucas PC, et al. (2000) Inhibition of adipogenesis by Wnt signaling. *Science* 289: 950–953.
- Bennett CN, Ross SE, Longo KA, Bajnok L, Hemati N, et al. (2002) Regulation of Wnt signaling during adipogenesis. *J Biol Chem* 277: 30998–31004.

58. Moldes M, Zuo Y, Morrison RF, Silva D, Park BH, et al. (2003) Peroxisome-proliferator-activated receptor gamma suppresses Wnt/beta-catenin signalling during adipogenesis. *Biochem J* 376: 607–613.
59. Xu G, Arregui C, Lilien J, Balsamo J (2002) PTP1B modulates the association of beta-catenin with N-cadherin through binding to an adjacent and partially overlapping target site. *J Biol Chem* 277: 49989–49997.
60. Xu G, Craig AW, Greer P, Miller M, Anastasiadis PZ, et al. (2004) Continuous association of cadherin with beta-catenin requires the non-receptor tyrosine-kinase Fer. *J Cell Sci* 117: 3207–3219.
61. Klein J, Fasshauer M, Ito M, Lowell BB, Benito M, et al. (1999) beta(3)-adrenergic stimulation differentially inhibits insulin signaling and decreases insulin-induced glucose uptake in brown adipocytes. *J Biol Chem* 274: 34795–34802.
62. Moyers JS, Bilan PJ, Reynet C, Kahn CR (1996) Overexpression of Rad inhibits glucose uptake in cultured muscle and fat cells. *J Biol Chem* 271: 23111–23116.
63. Bettaieb A, Liu S, Xi Y, Matsuo K, Matsuo I, et al. (2011) Differential regulation of endoplasmic reticulum stress by protein tyrosine phosphatase 1B and T cell protein tyrosine phosphatase. *Journal of Biological Chemistry* 286 (11): 9225–9235.
